# Supplementary material for: Effect of Intensivist Communication in a Simulated Setting on Interpretation of Prognosis Among Family Members of Patients at High Risk of Intensive Care Unit Admission: A Randomized Trial
Source: PubMed Central journal article supplement (PMC7113731; doi:10.1001/jamanetworkopen.2020.1945), 2020-04-01
Supplement: jamanetwopen-3-e201945-s002.pdf [file jamanetwopen-3-e201945-s002.pdf]

## Supplementary Online Content

Oppenheim IM, Lee EM, Vasher ST, Zaeh SE, Hart JL, Turnbull AE. Effect of intensivist communication in a simulated setting on interpretation of prognosis among family members of patients at high risk of intensive care unit admission: a randomized trial. *JAMA Netw Open*. 2020;3(4):e201945. doi:10.1001/jamanetworkopen.2020.1945

**eFigure 1.** Definition of Difference in Belief

**eFigure 2.** Study Flow Diagram

**eTable 1.** Unadjusted Models of the Effect of Intensivist's Response on Family Member Understanding of the Intensivist, Belief About Prognosis, and Difference in Belief

**eTable 2.** Effect of Intensivist's Response on Family Member Confidence in Their Own Prognostic Estimate and Their Perceived Prognostic Estimate of the Intensivist

**eTable 3.** Sensitivity Analysis of Effect of Intensivist's Response on Family Member Confidence in Their Own Prognostic Estimate and Their Perceived Prognostic Estimate of the Intensivist

**eReference.**

This supplementary material has been provided by the authors to give readers additional information about their work.

**eFigure 1.** Definition of Difference in Belief

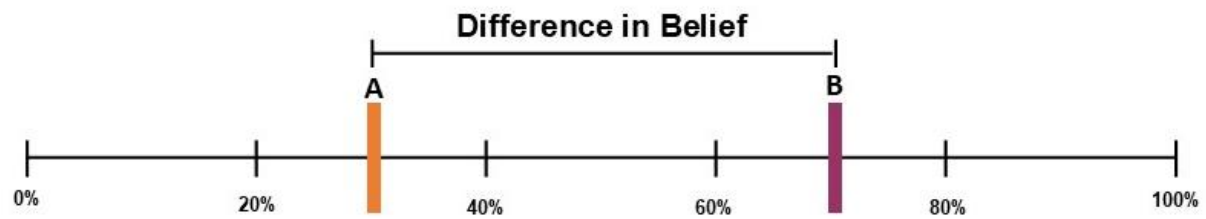

- A**  **Participant's** answer to: "If you had to guess, what do you think the doctor thinks is the chance that your loved one will survive this hospitalization?"
- B**  **Participant's** answer to: "What do you think are the chances that your loved one will survive this hospitalization?"

**eFigure 1:** Difference in Belief is defined as the participant's prognostic estimate (**B** in eFigure 1) minus their perception of the intensivist's prognostic estimate (**A** in eFigure 1).<sup>1</sup>

**eFigure 2.** Study Flow Diagram

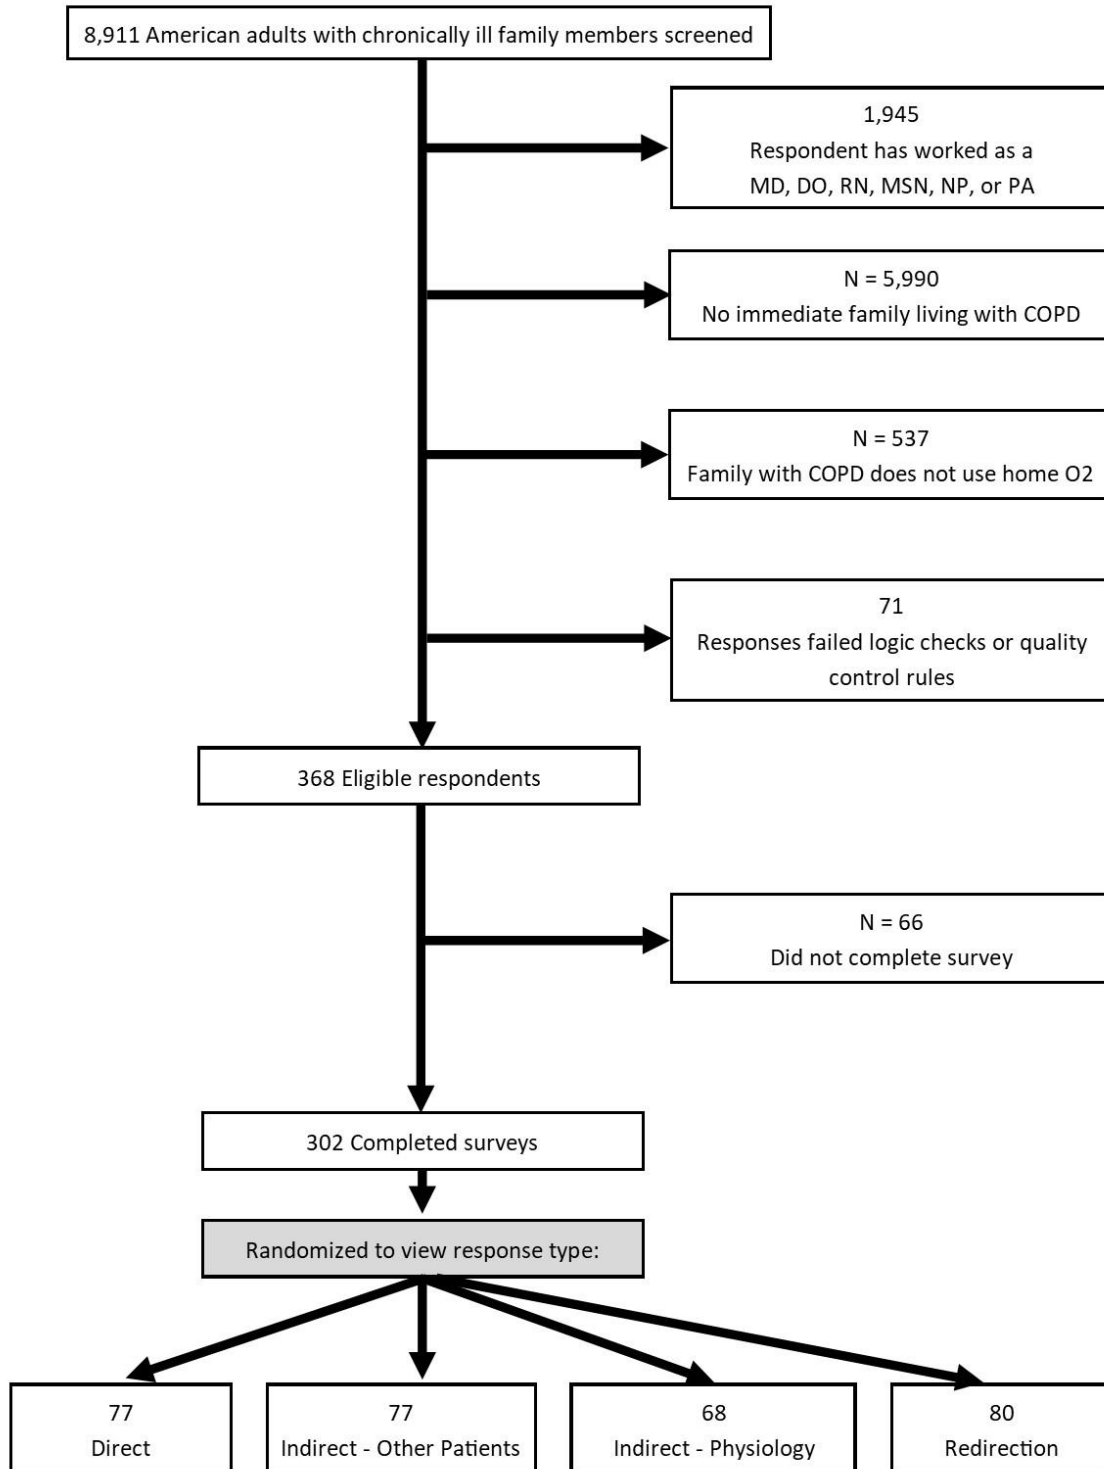

**eTable 1.** Unadjusted Models of the Effect of Intensivist’s Response on Family Member Understanding of the Intensivist, Belief About Prognosis, and Difference in Belief

| Model                                                                                                                                                                     | $\beta$ (95% CI) | P value |
|---------------------------------------------------------------------------------------------------------------------------------------------------------------------------|------------------|---------|
| <b>Question 1:</b> “What do you think <i>the doctor thinks</i> is the chance that your loved one will survive this hospitalization?” <sup>a</sup>                         |                  |         |
| <b>Model 1:</b> unadjusted                                                                                                                                                |                  |         |
| Direct                                                                                                                                                                    | <b>Ref</b>       | -       |
| Indirect – Other Patients                                                                                                                                                 | 10 (1, 19)       | .03     |
| Indirect – Physiology                                                                                                                                                     | 11 (2, 21)       | .02     |
| Redirection                                                                                                                                                               | 22 (13, 31)      | <.0001  |
| <b>Question 2:</b> “What do <i>you</i> think are the chances that your loved one will survive this hospitalization?” <sup>a</sup>                                         |                  |         |
| <b>Model 2:</b> unadjusted                                                                                                                                                |                  |         |
| Direct                                                                                                                                                                    | <b>Ref</b>       | -       |
| Indirect – Other Patients                                                                                                                                                 | 8 (-1, 17)       | .10     |
| Indirect – Physiology                                                                                                                                                     | 7 (-2, 16)       | .14     |
| Redirection                                                                                                                                                               | 17 (8, 26)       | .0002   |
| <b>Difference in Belief</b> = (response to Question 2) – (response to Question 1)                                                                                         |                  |         |
| <b>Model 3:</b> unadjusted                                                                                                                                                |                  |         |
| Direct                                                                                                                                                                    | <b>Ref</b>       | -       |
| Indirect – Other Patients                                                                                                                                                 | -2 (-9, 5)       | 0.54    |
| Indirect – Physiology                                                                                                                                                     | -4 (-12, 3)      | 0.23    |
| Redirection                                                                                                                                                               | -4 (-11, 3)      | 0.22    |
| <p>a. Measured on a 0 – 100 scale, with higher scores indicating a greater likelihood of survival.<br/> <b>Abbreviations:</b> CI, confidence interval; Ref, reference</p> |                  |         |

**eTable 2.** Effect of Intensivist’s Response on Family Member Confidence in Their Own Prognostic Estimate and Their Perceived Prognostic Estimate of the Intensivist

|                                                                  | Intensivist’s Response |                                  |                              |                    | Difference in proportions <sup>c</sup><br>(95% CI) | P value |
|------------------------------------------------------------------|------------------------|----------------------------------|------------------------------|--------------------|----------------------------------------------------|---------|
|                                                                  | Direct (n=77)          | Indirect – Other patients (n=77) | Indirect – Physiology (n=68) | Redirection (n=80) |                                                    |         |
| Confident they know what the doctor thinks <sup>a</sup><br>n (%) | 52 (68%)               | 48 (62%)                         | –                            | –                  | .05 (-.11, .21)                                    | 0.61    |
|                                                                  |                        | –                                | 43 (63%)                     | –                  | .04 (-.13, .21)                                    | 0.71    |
|                                                                  |                        | –                                | –                            | 51 (64%)           | .04 (-.12, .20)                                    | 0.74    |
| Confident in their own understanding <sup>b</sup><br>n (%)       | 59 (77%)               | 50 (65%)                         | –                            | –                  | .12 (-.04, .27)                                    | 0.16    |
|                                                                  |                        | –                                | 53 (78%)                     | –                  | -.01 (-.16, .14)                                   | 1.00    |
|                                                                  |                        | –                                | –                            | 58 (73%)           | .04 (-.11, .19)                                    | 0.68    |

a. Response to the question “How confident are you that you know what the doctor thinks your loved one’s chances for surviving the hospitalization are?” using on a 5-point Likert scale, with higher scores indicating greater confidence. Responses scored a 4 or 5 were analyzed as “Confident.”

b. Response to the question “How confident are you that you understand your loved one’s chances for surviving the hospitalization?” using on a 5-point Likert scale, with higher scores indicating greater confidence. Responses scored a 4 or 5 were analyzed as “Confident.”

c. The difference in the proportion of respondents who are confident compared to those randomized to view a direct response to the question.

**Abbreviations:** CI, confidence interval; Ref, reference

**eTable 3.** Sensitivity Analysis of Effect of Intensivist’s Response on Family Member Confidence in Their Own Prognostic Estimate and Their Perceived Prognostic Estimate of the Intensivist

|                                                                     | Intensivist’s Response |                                     |                                    |                       | Difference in proportions <sup>c</sup><br>(95% CI) | P value |
|---------------------------------------------------------------------|------------------------|-------------------------------------|------------------------------------|-----------------------|----------------------------------------------------|---------|
|                                                                     | Direct<br>(n=77)       | Indirect – Other<br>patients (n=77) | Indirect –<br>Physiology<br>(n=68) | Redirection<br>(n=80) |                                                    |         |
| Confident they know<br>what the doctor thinks <sup>a</sup> n<br>(%) | 65 (84%)               | 61 (79%)                            | –                                  | –                     | .05 (-.08, .19)                                    | 0.53    |
|                                                                     |                        | –                                   | 56 (73%)                           | –                     | .02 (-.11, .16)                                    | 0.91    |
|                                                                     |                        | –                                   | –                                  | 64 (80%)              | .04 (-.02, .18)                                    | 0.61    |
| Confident in their own<br>understanding <sup>b</sup><br>n (%)       | 68 (88%)               | 62 (81%)                            | –                                  | –                     | .08 (-.05, .20)                                    | 0.27    |
|                                                                     |                        | –                                   | 59 (87%)                           | –                     | -.02 (-.11, .14)                                   | 0.98    |
|                                                                     |                        | –                                   | –                                  | 70 (88%)              | .01 (-.10, .12)                                    | 1.00    |

a. Response to the question “How confident are you that you know what the doctor thinks your loved one’s chances for surviving the hospitalization are?” using on a 5-point Likert scale, with higher scores indicating greater confidence. Responses scored 3, 4, or 5 were analyzed as “Confident.”

b. Response to the question “How confident are you that you understand your loved one’s chances for surviving the hospitalization?” using on a 5-point Likert scale, with higher scores indicating greater confidence. Responses scored 3, 4, or 5 were analyzed as “Confident.”

c. The difference in the proportion of respondents who are confident compared to those randomized to view a direct response to the question.

**Abbreviations:** CI, confidence interval

**eReference.**

1. White DB, Ernecoff N, Buddadhumaruk P, et al. Prevalence of and Factors Related to Discordance About Prognosis Between Physicians and Surrogate Decision Makers of Critically Ill Patients. *JAMA*. 2016;315(19):2086. doi:10.1001/jama.2016.5351
