# Supplementary material for: Effect of Intensivist Communication in a Simulated Setting on Interpretation of Prognosis Among Family Members of Patients at High Risk of Intensive Care Unit Admission: A Randomized Trial
Source: PubMed Central journal article supplement (PMC7113731; doi:10.1001/jamanetworkopen.2020.1945), 2020-04-01
Supplement: jamanetwopen-3-e201945-s003.pdf [file jamanetwopen-3-e201945-s003.pdf]

## Data Sharing Statement

Oppenheim. Effect of Intensivist Communication in a Simulated Setting on Interpretation of Prognosis Among Family Members of Patients at High Risk of Intensive Care Unit Admission. JAMA Netw Open. Published April 01, 2020. 10.1001/jamanetworkopen.2020.1945

### Data

**Data available:** Yes

**Data types:** Deidentified participant data

**How to access data:** <https://doi.org/10.7281/T1/VWQ4J3>

**When available:** beginning date: 04-01-2020

### Supporting Documents

**Document types:** Codebook, README, R project and markdown files containing code for all analyses and figures. Documents available as .csv, .txt, .Rproj, and .Rmd files.

### Additional Information

**Who can access the data:** Anyone

**Types of analyses:** Any

**Mechanisms of data availability:** Freely available for download at:

Oppenheim, IM; Lee, EM; Vasher, ST; Zaeh, SE; Hart, JL; Turnbull, AE, 2020, "Data associated with the 2020 JAMA Network Open publication entitled: 'Effect of Intensivist Communication in a Simulated Setting on Interpretation of Prognosis Among Family Members of Patients at High Risk for Intensive Care Unit Admission: A Randomized Trial'", <https://doi.org/10.7281/T1/VWQ4J3>, Johns Hopkins University Data Archive.
